# Supplementary material
Source: publisher figshare collection journal article supplement (https://aacr.figshare.com/articles/dataset/_/22487388)

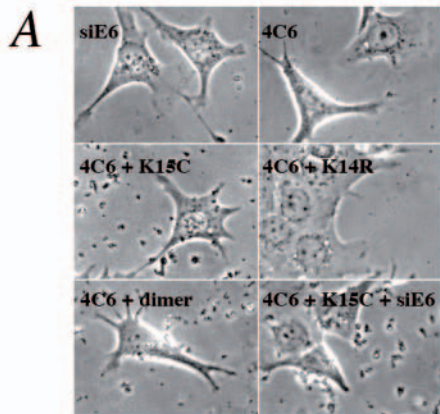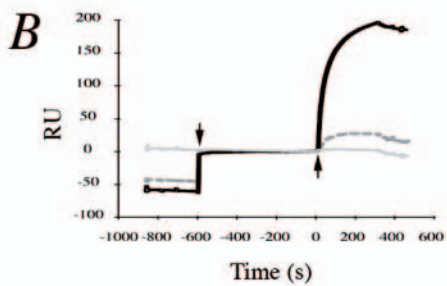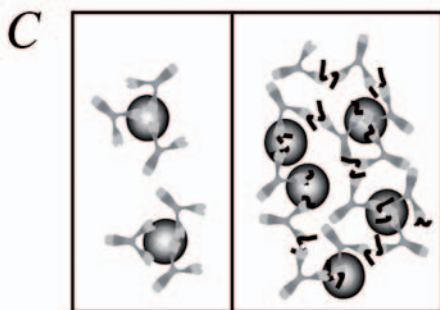

Supplementary figure 1

Supplement: Supplementary file 1 [file 39938982]
